# Supplementary material
Source: Springer Nature journal article supplement (https://www.springermedizin.de/resource/supplementary/12967_2012_1465_MOESM1_ESM.pdf/9574834)
Supplement: MOESM1 [file 9574834]

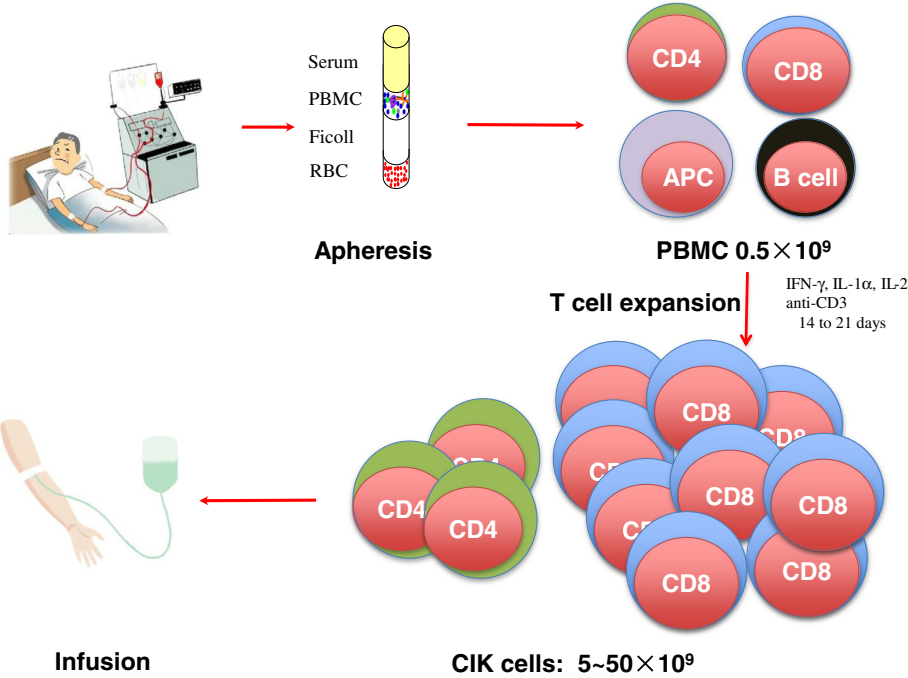

Serum

PBMC

Ficoll

RBC

CD4

CD8

APC

B cell

**Apheresis**

**PBMC  $0.5 \times 10^9$**

**T cell expansion**

$\text{IFN-}\gamma$ ,  $\text{IL-1}\alpha$ ,  $\text{IL-2}$   
anti-CD3  
14 to 21 days

CD8

CD8

CD8

CD8

CD8

CD8

CD4

CD4

**Infusion**

**CIK cells:  $5 \sim 50 \times 10^9$**
